# Supplementary material for: Anisotropic dye adsorption using templated smectic nanoporous polymer films: effects of pore size and pore charges on the adsorption
Source: Royal Society of Chemistry journal article supplement (doi:10.1039/d2nj01350a), 2022-01-01
Supplement: d2nj01350a1.pdf [file d2nj01350a1.pdf]

## Electronic Supporting Information

### **Anisotropic Dye Adsorption by Templated Smectic Nanoporous Polymer Films: Pore Size vs Pore Charges Affecting the Adsorption**

Hongju Zeng<sup>1</sup>, Ting Liang<sup>\*1,2</sup>, Huiyao Zhang<sup>1</sup>, Yanlin Wang<sup>1</sup>, Jingya Wen<sup>1</sup>, Hairong Yu<sup>1,2</sup> and Changjing Cheng<sup>\*1,2</sup>

1. College of Chemistry and Environment, Southwest Minzu University, Chengdu, Sichuan 610041, PR China. *Email:* liangting@swun.edu.cn; chengcj@swun.edu.cn.

2. Key Laboratory of Pollution Control Chemistry and Environmental Functional Materials for Qinghai-Tibet Plateau of the National Ethnic Affairs Commission. *Email:* liangting@swun.edu.cn; chengcj@swun.edu.cn.

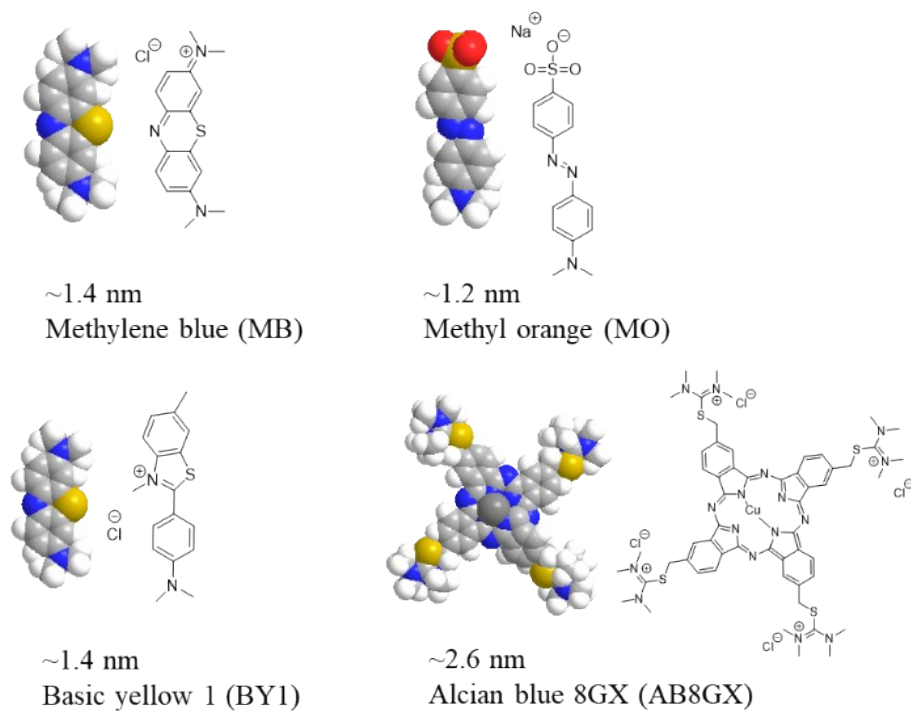

**Fig. S1** Molecular structures and space-filling models of methylene blue (MB), methyl orange (MO), basic yellow 1 (BY1), and alcian blue 8GX (AB8GX).

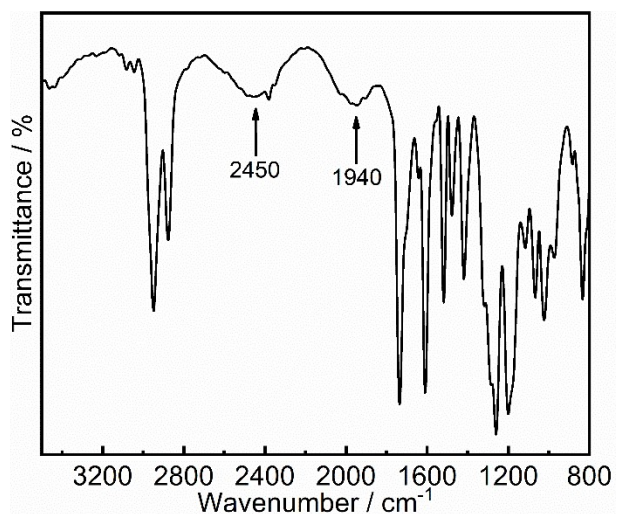

**Fig. S2** FT-IR spectrum of the monomer **6OBA·NC6** (1:1).

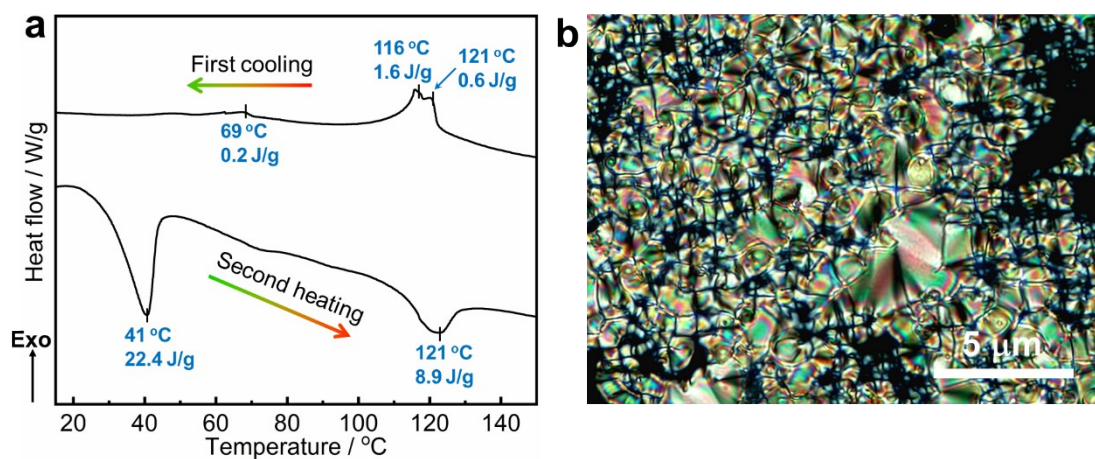

**Fig. S3** DSC spectrum (a) and POM picture (b) of the monomer **6OBA·NC6** (1:1) at 110 °C during the first cooling and second heating process.

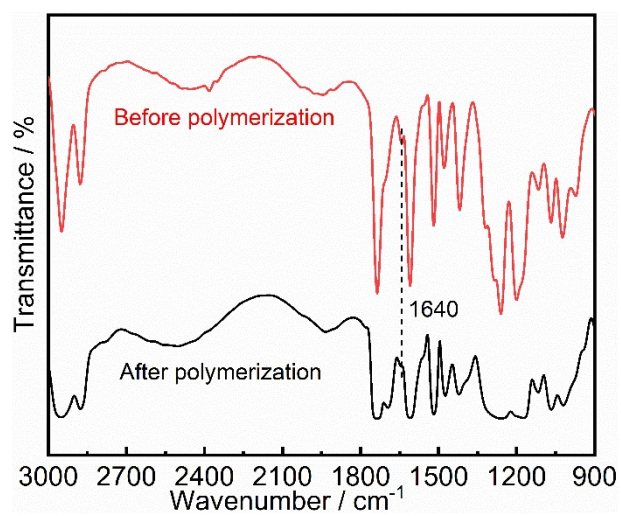

**Fig. S4** FT-IR spectra of the **6OBA·NC6·C6H** before and after photopolymerization.

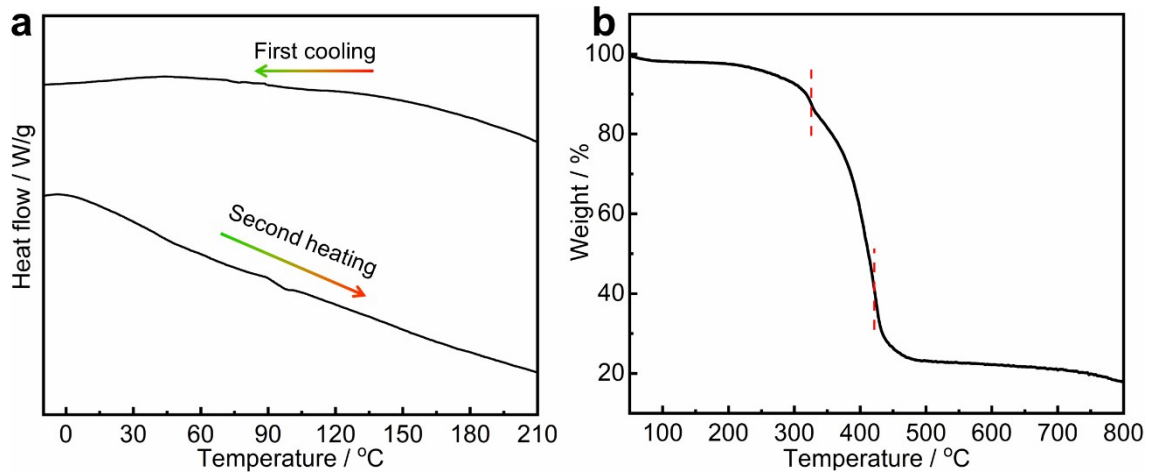

**Fig. S5** DSC (a) and TGA (b) spectrum of the pristine film.

Table S1 The calculated and measured weight loss of the NC6-removal film with different alignment.

| Film                    | Weight loss (%)  |        |
|-------------------------|------------------|--------|
|                         | Calculated value | Weight |
| Planar alignment        | 37.76            | 37.98  |
| Perpendicular alignment | 37.76            | 38.84  |

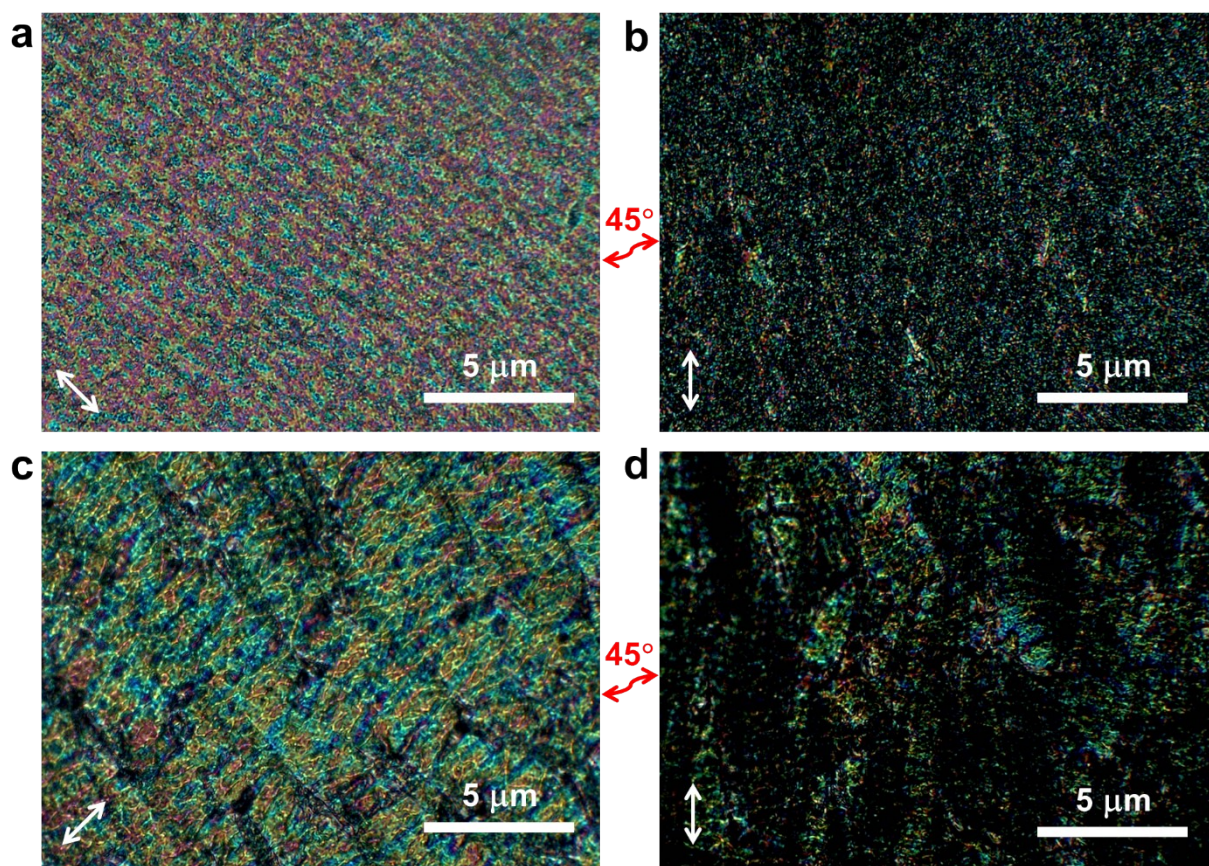

**Fig. S6** POM pictures of the planar alignment pristine film (a, b) and the NC6-removal film (c, d). The arrow represents the direction of alignment.



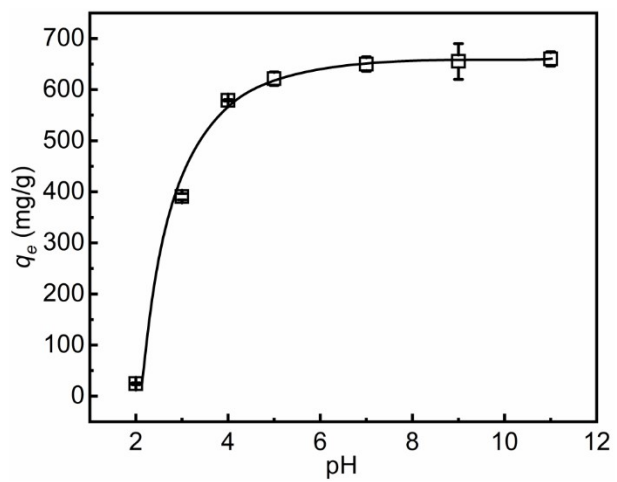

**Fig. S7** Effect of the solution pH on MB adsorption by the NC6-removal film.

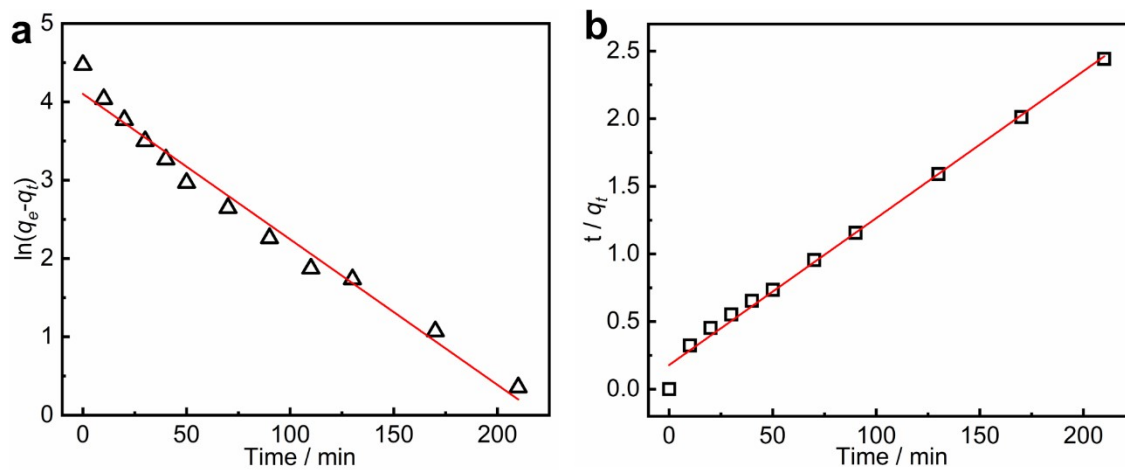

**Fig. S8** (a) Fitting of the Pseudo-first-order kinetics and (b) the Pseudo-second-order kinetics of MB adsorption onto the planar NC6-removal film.

Langmuir adsorption isotherm:

$$C_e / q_e = C_e / q_m + 1 / (K_L \times q_m) \quad (1)$$

where  $C_e$  ( $\text{mg}\cdot\text{L}^{-1}$ ) is the equilibrium concentration of MB,  $q_e$  and  $q_m$  ( $\text{mg}\cdot\text{g}^{-1}$ ) are the adsorption capacity at equilibrium and the maximum adsorption capacity,  $K_L$  is the Langmuir adsorption constant ( $\text{L}\cdot\text{mg}^{-1}$ ).

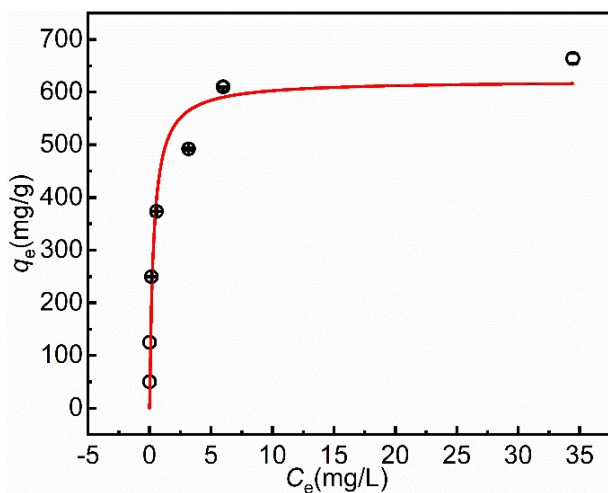

**Fig. S9** Comparison of experimental equilibrium values (marks) with predicted adsorption isotherm (line). Condition:  $\text{pH} = 5.5$ ,  $V = 5$  ml,  $m = 2$  mg, and  $T = 25$  °C.

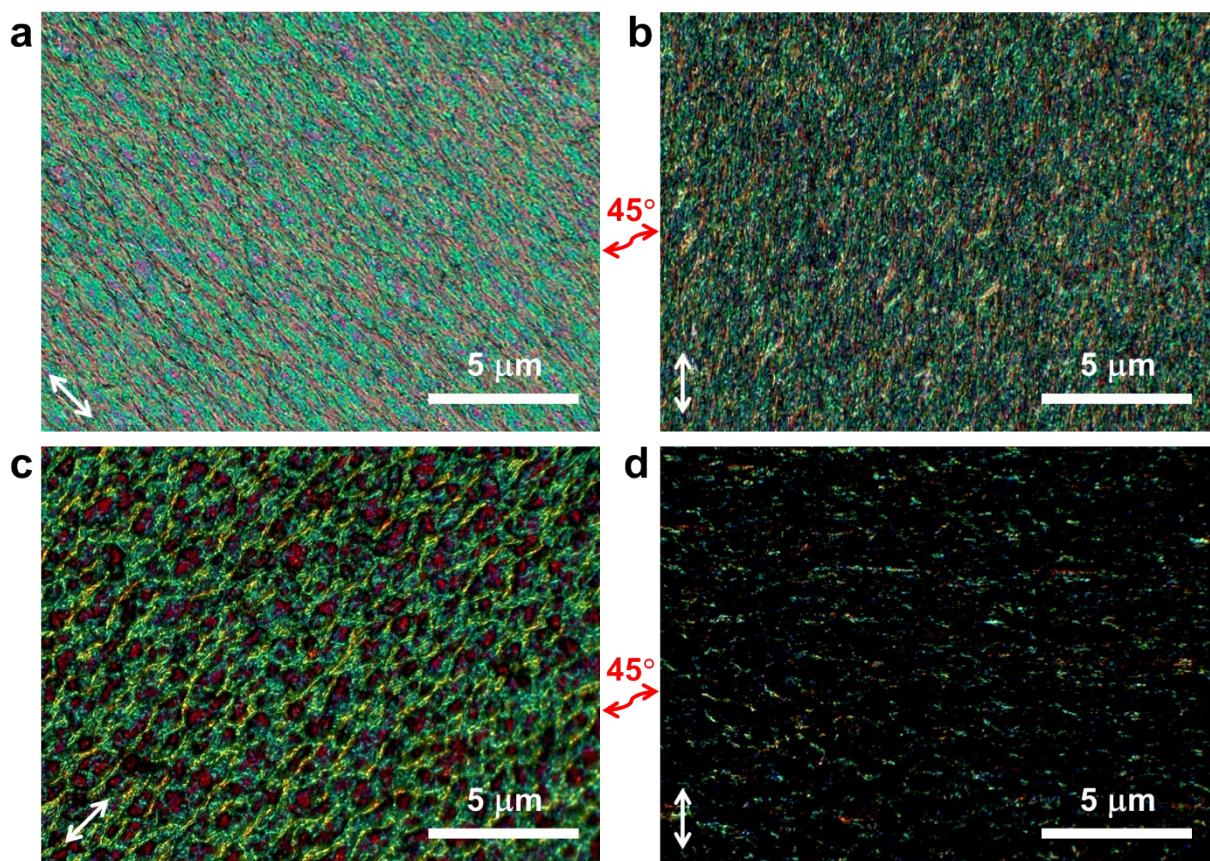

**Fig. S10** POM pictures of the planar aligned pristine film with **5CB** (a, b) and the **NC6/5CB** removal film (c, d). The arrow represents the direction of alignment.

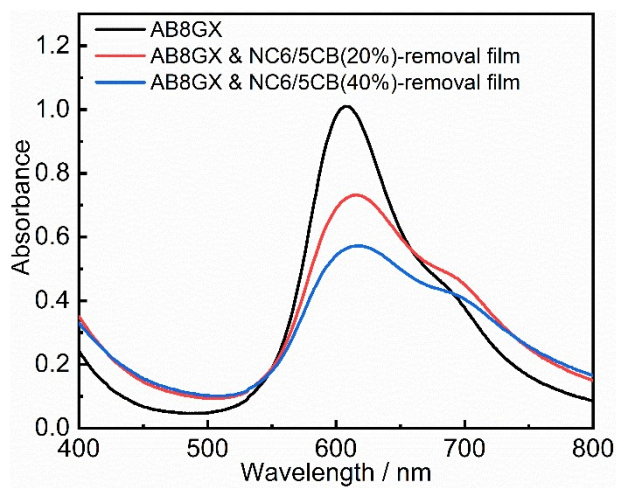

**Fig. S11** UV-vis spectra of AB8GX aqueous solutions before and after adsorption by **NC6/5CB** (20, 40%) removal film. Adsorption condition:  $\text{pH} = 4.28$ ,  $V_{\text{AB8GX}} = 5 \text{ ml}$ ,  $m = 2 \text{ mg}$ , and  $T = 25 \text{ }^\circ\text{C}$ .
